# Supplementary material for: Granzyme B PET Imaging Stratifies Immune Checkpoint Inhibitor Response in Hepatocellular Carcinoma
Source: Hindawi journal article supplement (doi:10.1155/2021/9305277), 2021-06-01

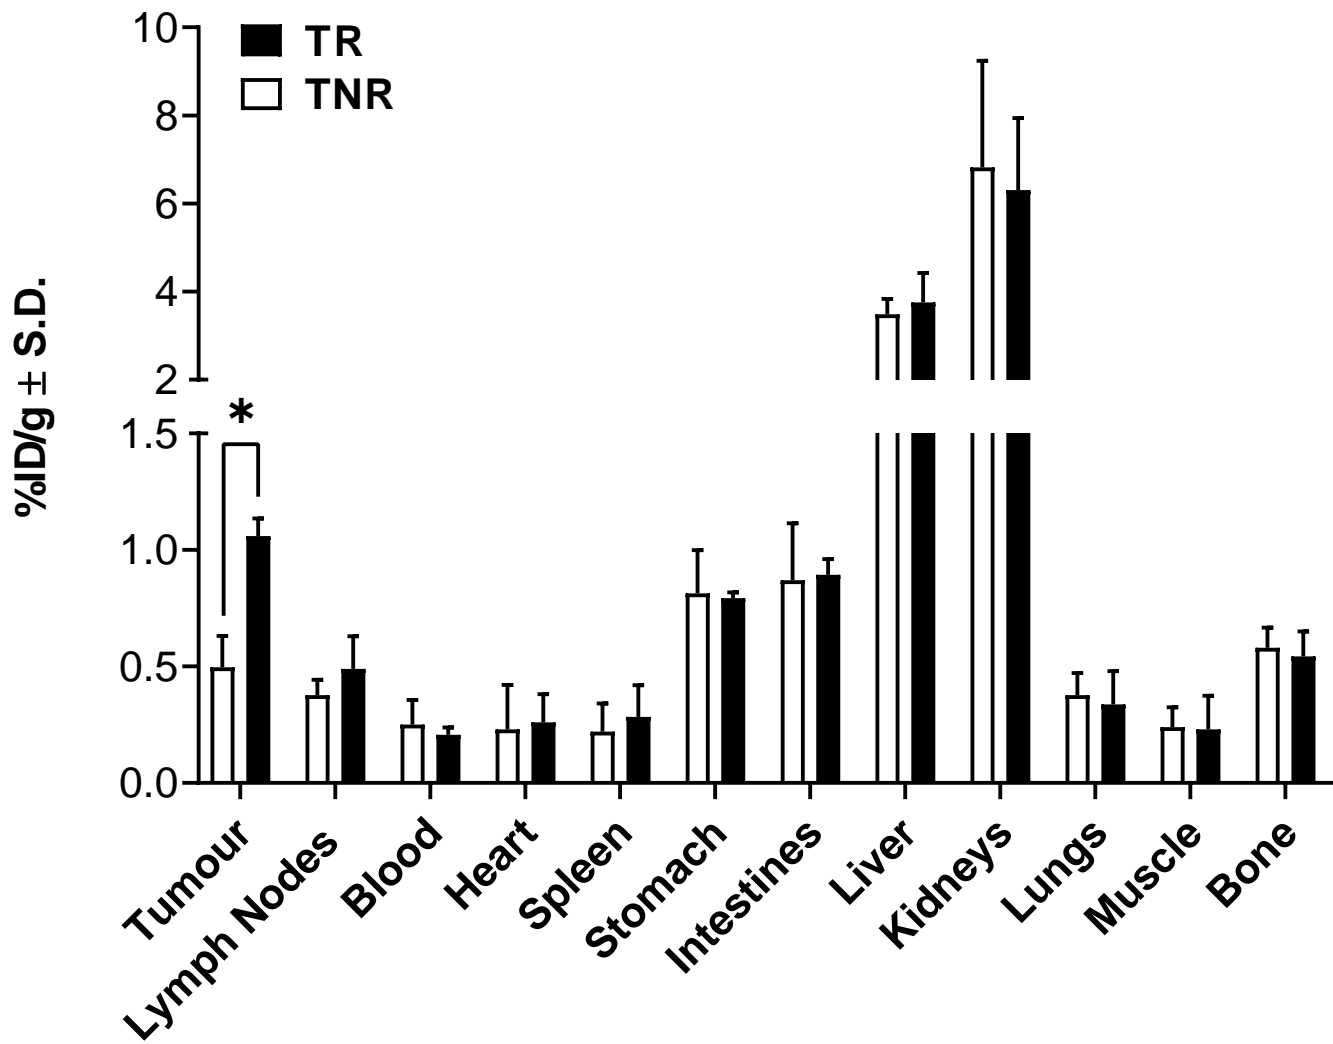

Supplement: f6 [file 9305277.f6.pdf]
